# Supplementary material for: Single-channel digital LAMP multiplexing using amplification curve analysis
Source: Royal Society of Chemistry journal article supplement (doi:10.1039/d2sd00038e), 2022-01-01
Supplement: d2sd00038e1.pdf [file d2sd00038e1.pdf]

## Supporting Information

### *Single-channel digital LAMP multiplexing using Amplification Curve Analysis*

Kenny Malpartida-Cardenas<sup>a,b,\*</sup>, Luca Miglietta<sup>a,b,\*</sup>, Tianyi Peng<sup>a</sup>, Ahmad Moniri<sup>b</sup>, Alison Holmes<sup>a</sup>, Pantelis Georgiou<sup>b</sup> and Jesus Rodriguez-Manzano<sup>a,†</sup>

<sup>a</sup> Department of Infectious Disease, Imperial College London, London W12 0NN, UK

<sup>b</sup> Department of Electrical and Electronic Engineering, Imperial College London, London SW7 2AZ, UK

\*Authors contributed equally.

<sup>†</sup>**Correspondence:** Jesus Rodriguez-Manzano, PhD, Department of infectious Disease, Imperial College London, Room 8N9, Commonwealth Building, Hammersmith Hospital Campus, Du Cane Road, London, W12 0NN; [j.rodriguez-manzano@imperial.ac.uk](mailto:j.rodriguez-manzano@imperial.ac.uk)

#### Contents:

- **Materials and Methods.**
- **Acknowledgements.**
- **Table S1:** Primer sequences of the LAMP assays used for the 5plex-LAMP.
- **Table S2:** Synthetic DNA sequences (gBlocks) and GenBank accession numbers.
- **FigureS1.** Standard and melting curves of the 5plex-LAMP in a real-time quantitative fluorescence-based instrument.
- **Figure S2.** Amplification curves of the 5plex-LAMP in dLAMP using a single fluorescence channel.
- **Figure S3.** Histogram showing the distribution of time-to-positive values of the 5plex-LAMP in dLAMP using a single fluorescence channel.
- **Figure S4.** Confusion matrices showing the prediction performance of the four machine-learning based methods evaluated in this study: FFI, ACA, MCA and AMCA.
- **References.**

## Materials and Methods

### 1. LAMP primer sequences

Primer sequences for each of the targets are summarised in Table S1. A LAMP assay was designed for the detection of the M gene of the influenza A virus. Genomic sequences were retrieved from NCBI (<http://www.ncbi.nlm.nih.gov/genbank/>) and sequence alignment was performed using the MUSCLE algorithm. A conserved region of interest was selected, and the sequence was uploaded into Primer Explorer for the generation of several sets of LAMP assays. Further manual optimisation and design of loops primers were performed using GENEious Prime 2020.1.2 (<https://www.geneious.com>). Primer sequences specific to each of the targets were analyzed with IDT OligoAnalyzer software (<https://eu.idtdna.com/pages/tools/oligoanalyzer>) using the J. SantaLucia thermodynamic table for melting temperature (T<sub>m</sub>) evaluation, hairpin, self-dimer, and cross-primer formation. Primers were purchased from IDT and rehydrated in TE (pH 8.00) at 500 µM. A 50x primer mix was prepared for each target and subsequently, the 10x 5plex-LAMP was obtained by mixing each specific primer mix at equitable volumes.

### 2. Multiplex real-time LAMP

Real-time LAMP reactions consisted of 6 µL final reaction volume including: 0.60 µL of 10x custom isothermal buffer, 0.30 µL of Mg SO<sub>4</sub> (100 mM stock), 0.34 µL of dNTPs (25 mM stock), 0.36 µL of BSA (20 mg/mL), 0.48 µL of Betaine (5 M stock), 0.60 µL of 10x 5plex LAMP primer mix, 0.15 µL of NaOH (0.2 M stock), 0.03 µL of Bst 2.0 DNA polymerase (120 kU/µL stock), 0.30 µL of EvaGreen (20x stock), 1.8 µL of the target oligonucleotide and enough nuclease free water to have a final volume of 6 µL. Amplification reaction was performed at 63°C for 35 cycles of 60 s duration reading at the end of each cycle. Melting curve analysis was performed after the amplification reaction and consisted of 1 cycle at 95°C for 10 s, 65°C for 60 s, and gradual temperature change from 65°C to 97°C with a step of 2.2 °C/s reading every 0.2 °C. LAMP protocol was based and adapted from Rodriguez-Manzano et al.<sup>1</sup>

### 3. Multiplex real-time digital LAMP

Real-time digital LAMP reactions consisted of 6 µL final reaction volume including: 0.024 µL of ROX (50 µM stock), 0.60 µL of 20x GE Sample Loading Reagent (Fluidigm), 0.60 µL of 10x custom isothermal buffer, 0.30 µL of MgSO<sub>4</sub> (100 mM stock), 0.34 µL of dNTPs (25 mM stock), 0.36 µL of BSA (20 mg/mL), 0.48 µL of Betaine (5 M stock), 0.60 µL of 10x 5plex LAMP primer mix, 0.15 µL of NaOH (0.2 M stock), 0.03 µL of Bst 2.0 DNA polymerase (120,000 U/µL stock), 0.30 µL of EvaGreen (20x stock), 1.8 µL of the target oligonucleotide and enough nuclease free water to have a final volume of 6 µL. The qdPCR 37K integrated fluidic circuit (IFC) was used to perform the dLAMP experiments. Firstly, the 48.48 control lines fluid were injected into each accumulator of the qdPCR 37K IFC and primed in the IFC Controller MX. Secondly, reactions and 1x GE were loaded into the qdPCR 37K IFC following manufacturer's instructions and the qdPCR 37K IFC was loaded IFC Controller MX. Finally, the qdPCR 37K IFC was placed into the Fluidigm's Biomark HD system and the amplification reaction was performed at 63°C for 35 cycles of 1 min duration reading at the end of each cycle. Melting curve analysis was performed after the amplification reaction and consisted of 1 cycle at 95°C for 10 s, 65°C for 60 s, and gradual temperature change from 65°C to 97°C with a step of 2.2 °C/s reading every 0.2 °C. The qdPCR 37K IFC contains 48 inlets which correspond to 48 panels. Each of the panels contains 770 wells with a volume of 0.85 nL.

#### 4. Synthetic oligonucleotides

Synthetic oligonucleotides (gBlock Gene Fragment) for each of the targets were purchased from IDT and resuspended at 5 ng/μL. Synthetic DNA sequences are included in Table S2.

#### 5. Evaluation of the 5plex-LAMP assay

Performance of the 5plex-LAMP was evaluated by using 10-fold serial dilutions of synthetic DNA of each of the targets at concentrations ranging from  $1.8 \times 10^8$  to  $1.8 \times 10^2$  copies per reaction. A total of 8 replicates were performed per each concentration and target.

Specificity of the 5plex-LAMP assay was evaluated *in-silico* by testing the primers with the sequences of the target pathogens and experimentally by cross-testing each LAMP assay with all the other targets including non-template controls (NTC).

#### 6. Machine learning methods for the detection of amplification events: ACA, MCA and FFI

Multiple standard packages and in-house scripts in Python (v3.7) were developed to analyse the data: (i) FFI values were extracted from each amplification curves, considering only the last values in the cycle time series. The FFI model consisted in a logistic regression classifier to distinguish different targets (please note that these assays are not optimised for improve FFI classification). (ii) A *k*-Nearest neighbour model was used to implement the ACA model using scikit-learn package with default parameters (for more information please see provided code and package documentation). The ACA classification accuracy (i.e., proportion of correctly identified events), sensitivity (i.e., true positive rate), and specificity (i.e., true negative rate) values in Tables 1 were computed for each binary classification subproblem in the one-vs-one multiclass classification scheme. (iii) The MCA classifier distinguished the melting peak temperature or peak  $T_m$ , using a supervised machine learning classifier, in this study we used a logistic regression. Performance of the models was evaluated based on out-of-sample classification accuracy, as determined by 10-fold cross-validation (using stratified splits). In order to assess the performance as a function of the volume of training data, shuffled stratified split was performed five times, with 5000 test samples. All data and code used in this study can be found at <https://github.com/LMigliet/pyiACA>.

#### Acknowledgements

This work was supported by the Imperial COVID-19 Research Fund (WDAI.G28059); the Department of Health and Social Care-funded Centre for Antimicrobial Optimisation (CAMO) at Imperial College London; the Imperial College Healthcare Trust NIHR Biomedical Research Centre (P80763); the EPSRC HiPEDS CDT (EP/ L016796/1 to K.M.C.); and EPSRC Doctoral Prize Fellowship (WDAI\_PA2018 to K.M.-C.). Authors AH, PG and JRM are affiliated with the NIHR Health Protection Research Unit (HPRU) in Healthcare Associated Infections and Antimicrobial Resistance at Imperial College London in partnership with the UK Health Security Agency (previously PHE) in collaboration with, Imperial Healthcare Partners, the University of Cambridge and the University of Warwick. The views expressed in this publication are those of the authors and not necessarily those of the NHS, the National Institute for Health and Care Research, the Department of Health and Social Care, or the UK Health Security Agency. AH is a National Institute for Health and Care Research (NIHR) Senior Investigator.

**Table S1. Primer sequences of the LAMP assays used for the 5plex-LAMP.**

| Assay     | Primer | Sequence (5' to 3')                               | Gene  | LOD <sup>a</sup>                                                   | Author                          | Ref. |
|-----------|--------|---------------------------------------------------|-------|--------------------------------------------------------------------|---------------------------------|------|
| LAMP-FA1  | F3     | GGCTATGGAGCAAATGGCTG                              | M     | 180 copies/<br>reaction<br><br>(1.8 µL sample<br>in 6 µL reaction) | This study                      |      |
| LAMP-FA1  | B3     | CACTTGAACCGTTGCATCTG                              |       |                                                                    |                                 |      |
| LAMP-FA1  | LF     | CTGACTAGCAACCTCCATGG                              |       |                                                                    |                                 |      |
| LAMP-FA1  | LB     | GCTGGTCTGAAAAATGATCTTCTTG                         |       |                                                                    |                                 |      |
| LAMP-FA1  | FIP    | CGCTTGCACCATTTGCCTAGCGATCGAGTGAGCAAGCAGC          |       |                                                                    |                                 |      |
| LAMP-FA1  | BIP    | TGGGACTCATCTAGCTCCAGTCACCCCATTCGTTTCTGA           |       |                                                                    |                                 |      |
| LAMPcov   | F3     | ACCAATAGCAGTCCAGATGA                              | N     | 10 copies/<br>reaction<br><br>(4 µL sample<br>in 10 µL reaction)   | <i>Rodriguez-Manzano et al.</i> | 1    |
| LAMPcov   | B3     | CACGATTGCAGCATTGTTAGC                             |       |                                                                    |                                 |      |
| LAMPcov   | LF     | GGACTGAGATCTTTTCATTTTACCCT                        |       |                                                                    |                                 |      |
| LAMPcov   | LB     | ACTGAGGGAGCCTTGAATACA                             |       |                                                                    |                                 |      |
| LAMPcov   | FIP    | TCTGGCCAGTTCCTAGGTAGTCCAGACAAATTCGTGGTGG          |       |                                                                    |                                 |      |
| LAMPcov   | BIP    | GGACTTCCCTATGGTGCTAACAAACGGGTGCCAATGTGATCT        |       |                                                                    |                                 |      |
| LAMP-FB1  | F3     | AGGGACATGAACAACAAAGA                              | NS1   | 1 copy<br><br>(5 µL sample<br>in 25 µL reaction)                   | <i>Mahony et al.</i>            | 2    |
| LAMP-FB1  | B3     | CAAGTTTAGCAACAAGCCT                               |       |                                                                    |                                 |      |
| LAMP-FB1  | LF     | TCAAACGGAACTTCCCTTCTTTC                           |       |                                                                    |                                 |      |
| LAMP-FB1  | LB     | GGATACAAGTCTTATCAACTCTGC                          |       |                                                                    |                                 |      |
| LAMP-FB1  | FIP    | TCAGGGACAATACATTACGCATATCGATAAAGGAGGAAGTAAACACTCA |       |                                                                    |                                 |      |
| LAMP-FB1  | BIP    | TAAACGGAACTTCCCTCAAACACCACTCTGGTCATAGGCATTC       |       |                                                                    |                                 |      |
| LAMP-HAdV | F3     | GTGCGACAGGACCATGTG                                | HEXON | 1.9×10 <sup>2</sup><br>copies/ml<br>of DNA                         | <i>Li et al.</i>                | 3    |
| LAMP-HAdV | B3     | GGTAGACGGCCTCGATGA                                |       |                                                                    |                                 |      |
| LAMP-HAdV | LF     | GGCCCCCATGGACATGAA                                |       |                                                                    |                                 |      |
| LAMP-HAdV | LB     | CCACCCTGCTTTATCTTCTTTTCG                          |       |                                                                    |                                 |      |
| LAMP-HAdV | FIP    | AGCATGTTCTGTCCCAGGTCGGCATTCCCTTCTCCAGCAA          |       |                                                                    |                                 |      |
| LAMP-HAdV | BIP    | GAGGTGGATCCCATGGATGAGCACTCTGACCACGTCTGAARAC       |       |                                                                    |                                 |      |
| LAMP-KPn  | F3     | GGATATCTGACCAGTCGG                                | RCSA  | 10 copies<br>/reaction<br><br>(1 µL sample<br>in 5 µL reaction)    | <i>Dong et al.</i>              | 4    |
| LAMP-KPn  | B3     | GGGTTTTGCGTAATGATCTG                              |       |                                                                    |                                 |      |
| LAMP-KPn  | LB     | GAAGACTGTTTCGTGCATGATGA                           |       |                                                                    |                                 |      |
| LAMP-KPn  | FIP    | CGACGTACAGTGTCTGCAAGTTTTAAAAACAGGAAATCGTTGAGG     |       |                                                                    |                                 |      |
| LAMP-KPn  | BIP    | CGGCGGTGGTGTCTGAAATTTGCGAATAATGCCATTACTTTC        |       |                                                                    |                                 |      |

<sup>a</sup>Limit of detection (LOD).

**Table S2. Synthetic DNA sequences (gBlocks) and accession numbers.**

| Target gene                                                      | Sequence (5' to 3')                                                                                                                                                                                                                                                                                                                                                                                                                                                                                                                                                                                                                                                                                                                                                                                                            |
|------------------------------------------------------------------|--------------------------------------------------------------------------------------------------------------------------------------------------------------------------------------------------------------------------------------------------------------------------------------------------------------------------------------------------------------------------------------------------------------------------------------------------------------------------------------------------------------------------------------------------------------------------------------------------------------------------------------------------------------------------------------------------------------------------------------------------------------------------------------------------------------------------------|
| <p>Klebsiella<br/>Pneumoniae<br/>(RCSA)<br/><br/>NC_012731.1</p> | <p>ATGTCAACGATGATTATGGATTTGTGCAGCTATACCCGGTTGGGATTGACGGGA<br/>TATCTGACCAGTCGGGGAATTAATAAACAGGAAATCGTTGAGGTCAACAGTGCT<br/>GCGGATCTGCAGAAACACTGTACGTCGTGTTGCCGCGGGTGGTGTCTGAAT<br/>GAAGACTGTTTCGTGCATGATGATGAAAGTAATGGCATTATTCGCCAGATCATT<br/>ACGCAAAACCCGGCGACGCTGTTTGTATCTTTATGTCGCTGGCGAACATCCAT<br/>TTTGACCGCTATTTGCGGGTACGGAAGAATCTGCTAATCAGTTCAAAATCGATA<br/>ACCCCAAAAGACCTTGATGTTATTCTGGTTAATTATCTTAAATACAAAACACC<br/>AGTGTAGGGCAGTTAACTTTACCGACATTGTCAGTAAACAGAATCAAAT<br/>ATGCTGCAAATGTGGATGGCCGGGCATGGTACTTCGCAAATCTCAACGCAAATG<br/>AACATCAAAGCGAAGACGGTATCGTCGCATAAAGGCAATATTAATAAGAAAATA<br/>CAAACGCATAATAAGCAGGTGATTTATCATATCGTTCGGCTGACCGAAAACATC<br/>ACCTCCGGTATTCAGGTAATATGCGCTGA</p>                                                                                                                            |
| <p>Human<br/>Adenovirus<br/>(HEXON)<br/><br/>AF542104.1</p>      | <p>AGGTCTCCATCATGTTTGACTCCTCAGTCAGCTGGCCTGGCAATGACAGGCTGT<br/>TGAGCCCAATGAGTTTGAAATCAAGCGCACTGTGGACGGGGAAGGATAACAACG<br/>TGGCACAATGCAACATGACCAAGACTGGTTCCTAGTTCAGATGCTTGCCAACT<br/>ACAACATTGGCTACCAGGGCTTTTACATCCCTGAGGGATAAAGGATCGCATGT<br/>ACTCTTTTTTCAGAAACTTCCAGCCTATGAGCAGGCAGGTGGTTGATGAGGTTA<br/>ATTACTGACTACAAAGCCGTCACCTTACCATACCAACACAACAACTCTGGCT<br/>TTGTAGGGTACCTTGACCTACTATGAGACAAGGGGAACCTTACCCAGCCAATT<br/>ATCCATACCCGCTCATCGGAACACTGCCGTTAAGAGTGTTACCCAGAAAAAGT<br/>TCCTGTGCGACAGGACCATGTGGCGCATTCCCTTCTCCAGCAACTTCATGTCCA<br/>TGGGGGCCCTTACCGACCTGGGACAGAACATGCTCTATGCCAACTCAGCCCATG<br/>CGCTGGACATGACTTTTGAGGTGGATCCCATGGATGAGCCCACCCTGCTTTATC<br/>TTCTTTTGAAGTCTTCGACGTGGTCAGAGTGCACCAGCCACACCGCGGCGTCA<br/>TCGAGGCCGTCTACCTGCGCACACCGTCTCGGCCGGCAACGCCACCACATAA</p>                                       |
| <p>Influenza B<br/>(NS1)<br/><br/>CY120033.1</p>                 | <p>TAATACGACTCACTATAGGGAGTAAAAATGATGAAAGTACTCCTATTTATGAATC<br/>CGTCTGCTGGAATTGAAGGGTTTGAGCCACTGTATGAAAAGTTCCTCAAATAGC<br/>AACTGTCCGGAATACAATTGGACCGATTACCCTTCAACACCAGGGAGGTGCCTTGA<br/>TGACATAGAAGAAGAACCAGAGGATGTTGATGGCCCACTGAAATAGTATTAAGGG<br/>ACATGAACAACAAGATGCAAGGCAAAAGATAAAGGAGGAAGTAAACACTCAGAAA<br/>GAAGGGAAGTTCCGTTTGACAATAAAAAGGGATATGCGTAATGTATTGCTTGTAG<br/>AGTGTGGTAAACGGAACATTCTCAAACACCCCAATGGATAACAAGTCTTATCAA<br/>CTCTGCATAGATTGAATGCATATGACCAGAGTGAAGGCTTGTGCTAAACTTGT<br/>GCTACTGATGATCTTACAGTGGAGGATGAAGAAGATGGCCATCGGATCCTCAACTC<br/>ACTCTTCGAGCGTCTTAATGAAGGACATTCAAAGCCAATTCGAGCAGCTGAAACTG<br/>CGGTGGGAGTCTTATCCCAATTTGGTCAAGAGCACCGATTATCACCAGAAGAGGGA<br/>GACAATTAGACTGGTCACGGAAGAATTTATCTTTTAAAGTAAAGAATTGATGATA<br/>ACATATTGTTCCACAAAACAGTAATAGCTAACAGCTCCATAATAGCTGCTTTAGTG<br/>AGGGTAAATT</p> |
| <p>Influenza A (M)<br/><br/>NC_002016</p>                        | <p>TAATACGACTCACTATAGAGCGAAAAGCAGGTAGATATTGAAAGATGAGTCTTCTAAC<br/>CGAGGTCGAAACGTACGTTCTCTATCATCCCGTCAGGCCCCCTCAAAGCCGAGAT<br/>CGCACAGAGACTTGAAGATGTCTTTGCAGGGGAAGAACACCGATCTTGAGTTCTCAT<br/>GGAATGGCTAAAGACAAGACCAATCCTGTACCTCTGACTAAGGGGATTTTAGGATT<br/>TGTGTTACGCTCACCGTGCCAGTGAGCGAGGACTGCAGCGTAGACGCTTTGTCCA</p>                                                                                                                                                                                                                                                                                                                                                                                                                                                                                                           |

|                   |                                                                                                                                                                                                                                                                                                                                                                                                                                                                                                                                                                                                                                                                                                                                                                                                                                                              |
|-------------------|--------------------------------------------------------------------------------------------------------------------------------------------------------------------------------------------------------------------------------------------------------------------------------------------------------------------------------------------------------------------------------------------------------------------------------------------------------------------------------------------------------------------------------------------------------------------------------------------------------------------------------------------------------------------------------------------------------------------------------------------------------------------------------------------------------------------------------------------------------------|
|                   | AAATGCCCTTAATGGGAACGGGGATCCAAATAACATGGACAAAGCAGTTAAACTGTA<br>TAGGAAGCTCAAGAGGGAGATAACATTCCATGGGGCCAAAGAAATCTCACTCAGTTA<br>TTCTGCTGGTGCACCTTGCCAGTTGTATGGCCTCATATACAACAGGATGGGGGCTGT<br>GACCACTGAAGTGGCATTGGCCTGGTATGTGCAACCTGTGAACAGATTGCTGACTC<br>CCAGCATCGGTCTCATAGGCAAATGGTGACAACAACCAACCCACTAATCAGACATGA<br>GAACAGAATGGTTTTAGCCAGCACTACAGCTAAGGCTATGGAGCAAATGGCTGGATC<br>GAGTGAGCAAGCAGCAGAGGCCATGGAGTTGCTAGTCAGGCTAGGCAAATGGTGCA<br>AGCGATGAGAACCATTGGGACTCATCCTAGCTCCAGTGCTGGTCTGAAAAATGATCT<br>TCTTGAATAATTTGCAGGCCTATCAGAAACGAATGGGGGTGCAGATGCAACGGTTCAA<br>GTGATCCTCTCGCTATTGCCGCAAATATCATTGGGATCTTGCACTTGATATTGTGGA<br>TTCTTGATCGTCTTTTTTCAAATGCATTTACCGTCGCTTTAAATACGGACTGAAAG<br>GAGGGCCTTCTACGGAAGGAGTGCCAAAGTCTATGAGGGAAGAATATCGAAAGGAAC<br>AGCAGAGTGCTGTGGATGCTGACGATGGTCATTTTGTGAGCATAGAGCTGGAGTAAA<br>AAACTACCTTGTTTCTACTCTTTAGTGAGGGTTAATT |
| SARS-CoV-2<br>(N) | IDT 2019-nCoV_N Positive Control                                                                                                                                                                                                                                                                                                                                                                                                                                                                                                                                                                                                                                                                                                                                                                                                                             |

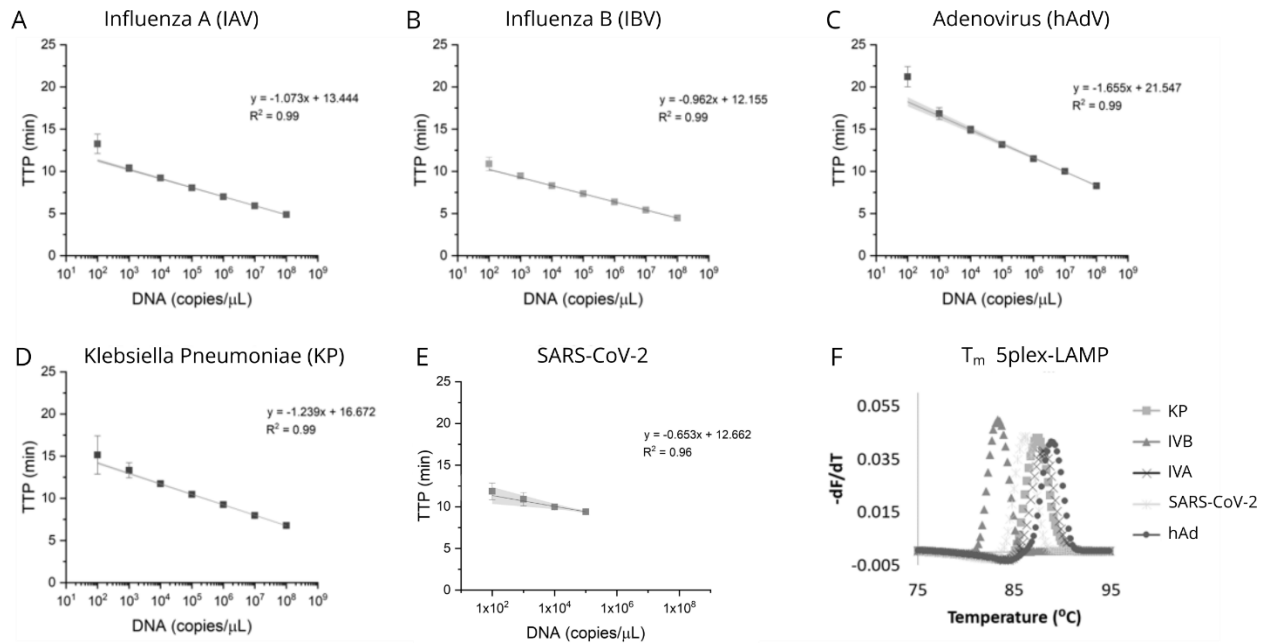

**Figure S1.** Standard and melting curves of the 5plex-LAMP in a real-time quantitative fluorescence-based instrument. (A) Standard curve for Influenza A virus. (B) Standard curve for Influenza B virus. (C) Standard curve for human adenovirus. (D) Standard curve of *Klebsiella Pneumoniae*. (E) Standard curve for severe acute respiratory syndrome coronavirus 2. (F) Specific melting curves of all the targets.

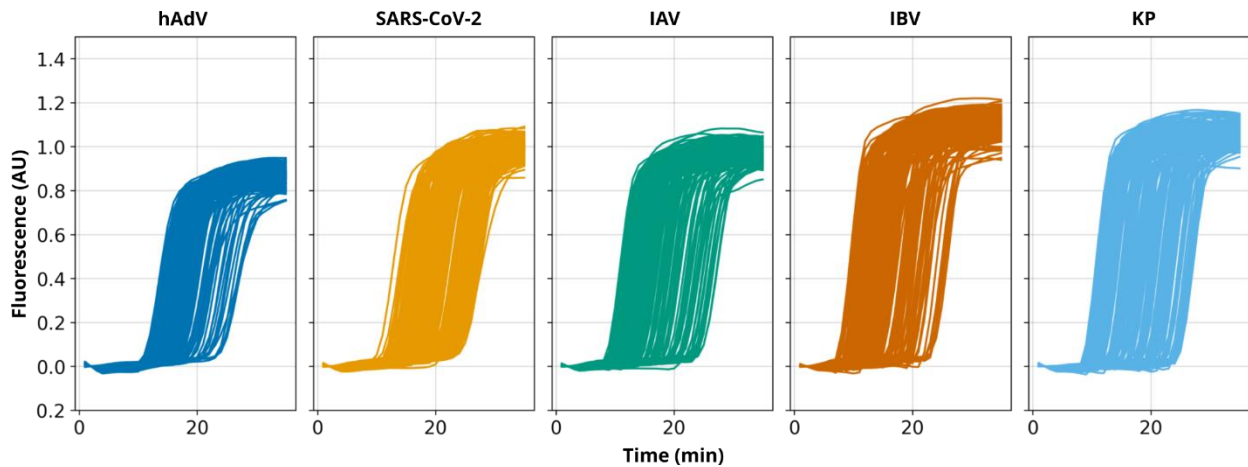

**Figure S2.** Amplification curves of the 5plex-LAMP in dLAMP using a single fluorescence channel.

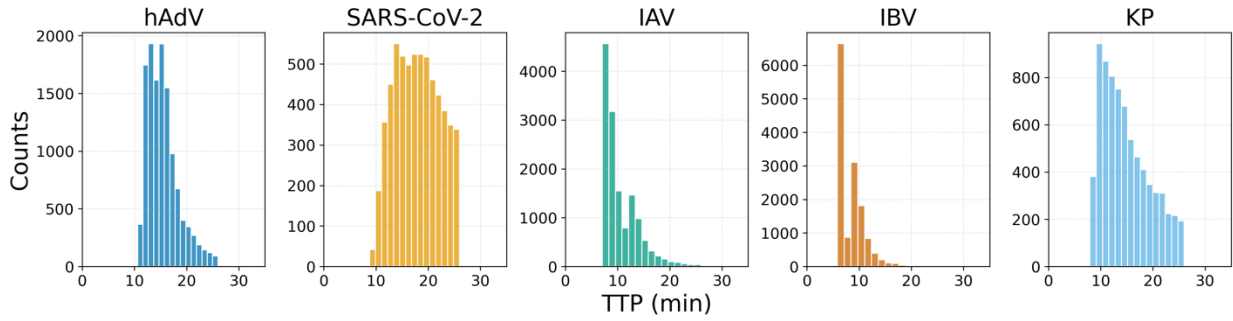

**Figure S3.** Histogram showing the distribution of Time-To-Positive (TTP) values of the 5plex-LAMP in dLAMP using a single fluorescence channel.

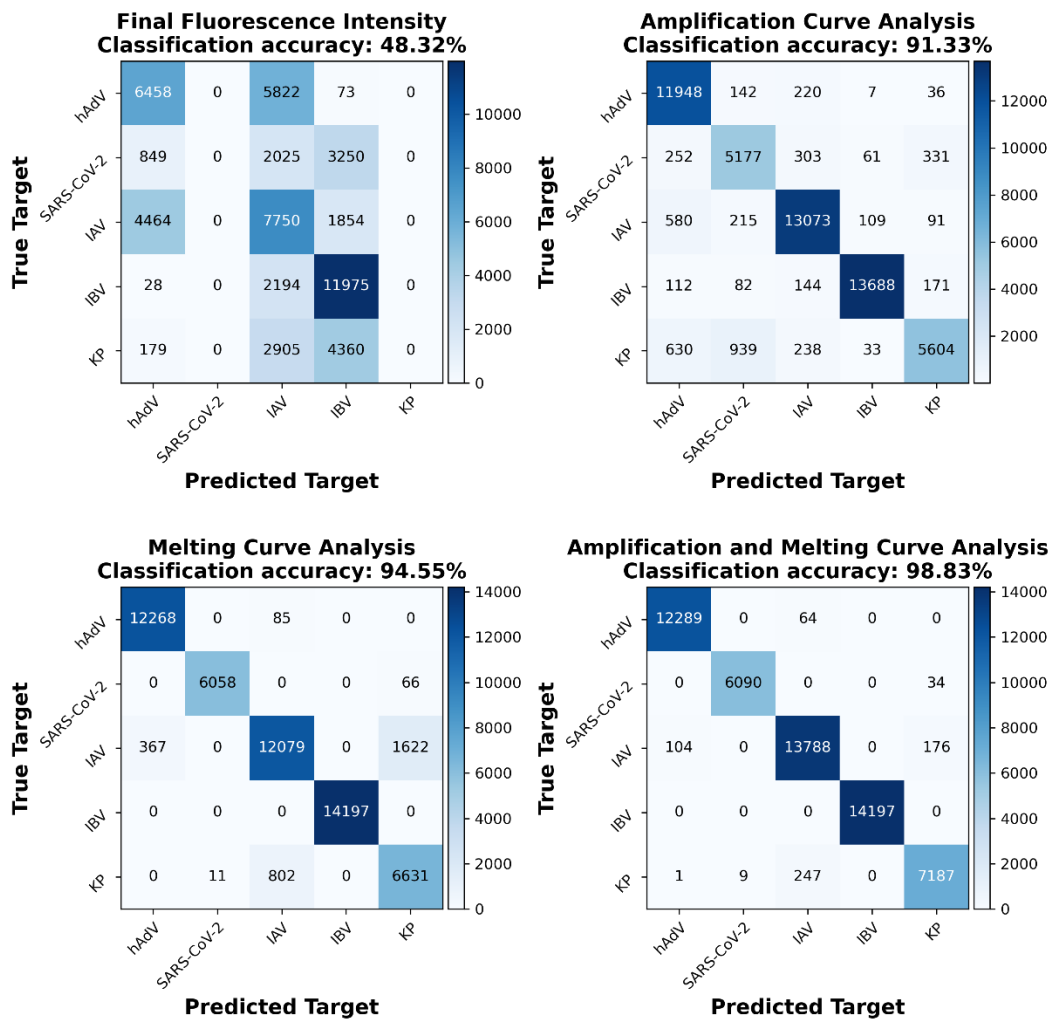

**Figure S4.** Confusion matrices showing the prediction performance of the four methods evaluated in this study: FFI, ACA, MCA and AMCA.



## References

- 1 J. Rodriguez-Manzano, K. Malpartida-Cardenas, N. Moser, I. Pennisi, M. Cavuto, L. Miglietta, A. Moniri, R. Penn, G. Satta, P. Randell, F. Davies, F. Bolt, W. Barclay, A. Holmes and P. Georgiou, *ACS Cent. Sci.*, 2021, acscentsci.0c01288.
- 2 J. Mahony, S. Chong, D. Bulir, A. Ruyter, K. Mwawasi and D. Waltho, *J. Clin. Virol.*, 2013, **58**, 127–131.
- 3 F. Li, L. Zhao, J. Deng, R. Zhu, Y. Sun, L. Liu, Y. Li and Y. Qian, *Zhonghua er ke za zhi = Chinese J. Pediatr.*, 2013, **51**, 52–7.
- 4 D. Dong, W. Liu, H. Li, Y. Wang, X. Li, D. Zou, Z. Yang, S. Huang, D. Zhou, L. Huang and J. Yuan, *Front. Microbiol.*, , DOI:10.3389/fmicb.2015.00519.
